# Supplementary material for: Decreasing Shortest Path Length of the Sensorimotor Network Induces Frontal Glioma-Related Epilepsy
Source: PubMed Central journal article supplement (PMC8888886; doi:10.3389/fonc.2022.840871), 2022-02-16
Supplement: DataSheet_1.pdf [file DataSheet_1.pdf]

## Supplemental Tables

**Table S1. Montreal Neurological Institute (MNI) locations of 22 nodes in the sensorimotor network**

| Regions of interesting | Modified Cyto-architectonic         | Left hemisphere |     |    | Right hemisphere |     |    |
|------------------------|-------------------------------------|-----------------|-----|----|------------------|-----|----|
|                        |                                     | X               | Y   | Z  | X                | Y   | Z  |
| A6m_L(R)               | Medial area BA 6                    | 5               | 36  | 38 | 6                | 38  | 35 |
| A4hf_L(R)              | Area BA 4 (head and face)           | -49             | -8  | 39 | 55               | -2  | 33 |
| A4ul_L(R)              | Area BA 4 (upper limb)              | -26             | -25 | 63 | 34               | -19 | 59 |
| A4t_L(R)               | Area BA 4 (trunk)                   | -13             | -20 | 73 | 15               | -22 | 71 |
| A4tl_L(R)              | Area BA 4 (tongue and larynx)       | -52             | 0   | 8  | 54               | 4   | 9  |
| A1_2_3ll_L(R)          | Area BA 1/2/3 (lower limb)          | -8              | -38 | 58 | 10               | -34 | 54 |
| A4ll_L(R)              | Area BA 4 (lower limb)              | -4              | -23 | 61 | 5                | -21 | 61 |
| A1_2_3ulhf_L(R)        | Area BA 1/2/3 (upper limb and face) | -50             | -16 | 43 | 50               | -14 | 44 |
| A1_2_3tonIa_L(R)       | Area BA 1/2/3 (tongue and larynx)   | -56             | -14 | 16 | 56               | -10 | 15 |
| A2_L(R)                | Area BA 2                           | -46             | -30 | 50 | 48               | -24 | 48 |
| A1_2_3tru_L(R)         | Area BA 1/2/3 (trunk)               | -21             | -35 | 68 | 20               | -33 | 69 |

\*BA = Brodmann area.

**Table S2. Montreal Neurological Institute (MNI) locations of 22 nodes in the visual network.**

| Regions of interesting | Modified Cyto-architectonic            | Left hemisphere |     |     | Right hemisphere |     |     |
|------------------------|----------------------------------------|-----------------|-----|-----|------------------|-----|-----|
|                        |                                        | X               | Y   | Z   | X                | Y   | Z   |
| cLinG_L(R)             | caudal lingual gyrus                   | -11             | -82 | -11 | 10               | -85 | -9  |
| rCunG_L(R)             | rostral cuneus gyrus                   | -5              | -81 | 10  | 7                | -76 | 11  |
| cCunG_L(R)             | caudal cuneus gyrus                    | -6              | 94  | 1   | 8                | -90 | 12  |
| rLinG_L(R)             | rostral lingual gyrus                  | -17             | -60 | -6  | 18               | -60 | -7  |
| vmPOS_L(R)             | ventromedial parietal occipital sulcus | -13             | -68 | 12  | 15               | -63 | 12  |
| mOccG_L(R)             | middle occipital gyrus                 | -31             | -89 | 11  | 34               | -86 | 11  |
| V5/MT+_L(R)            | area V5/MT+                            | -46             | -74 | 3   | 48               | -70 | -1  |
| OPC_L(R)               | occipital polar cortex                 | -18             | -99 | 2   | 22               | -97 | 4   |
| iOccG_L(R)             | inferior occipital gyrus               | -30             | -88 | -12 | 32               | -85 | -12 |
| msOccG_L(R)            | medial superior occipital gyrus        | -11             | -88 | 31  | 16               | -85 | 34  |
| lsOccG_L(R)            | lateral superior occipital gyrus       | -22             | -77 | 36  | 29               | -75 | 36  |

\*BA = Brodmann area.

**Table S3. Montreal Neurological Institute (MNI) locations of 6 nodes in the auditory network.**

| Regions of interesting | Modified Cyto-architectonic  | Left hemisphere |     |    | Right hemisphere |     |    |
|------------------------|------------------------------|-----------------|-----|----|------------------|-----|----|
|                        |                              | X               | Y   | Z  | X                | Y   | Z  |
| A41/42_R               | BA 41/42                     | -54             | -32 | 12 | 54               | -24 | 11 |
| TE_R                   | TE1.0 and TE1.2              | -50             | -11 | 1  | 51               | -4  | -1 |
| A40rv_L(R)             | rostroventral area 40 (PFop) | -53             | -31 | 23 | 55               | -26 | 26 |

\*BA = Brodmann area.

**Table S4. Montreal Neurological Institute (MNI) locations of 20 nodes in the right executive control network.**

| Regions of interesting | Modified Cyto-architectonic      | Right hemisphere |     |     |
|------------------------|----------------------------------|------------------|-----|-----|
|                        |                                  | X                | Y   | Z   |
| A8dl_R                 | dorsolateral area BA 8           | 22               | 26  | 51  |
| A9m_R                  | medial area BA 9                 | 6                | 38  | 35  |
| A9/46d_R               | dorsal area BA 9/46              | 30               | 37  | 36  |
| IFJ_R                  | inferior frontal junction        | 42               | 11  | 39  |
| A46_R                  | area BA 46                       | 28               | 55  | 17  |
| A9/46v_R               | ventral area BA 9/46             | 42               | 44  | 14  |
| A8vl_R                 | ventrolateral area BA 8          | 42               | 27  | 39  |
| A6vl_R                 | ventrolateral area BA 6          | 34               | 8   | 54  |
| A10l_R                 | ventrolateral area BA 10         | 25               | 61  | -4  |
| IFS_R                  | inferior frontal sulcus          | 48               | 35  | 13  |
| A45r_R                 | rostral area BA 45               | 51               | 36  | -1  |
| A12/47l_R              | lateral area BA 12/47            | 40               | 39  | -14 |
| A21c_R                 | caudal area BA 21                | 65               | -29 | -13 |
| A37vl_R                | ventrolateral area BA 37         | 54               | -57 | -8  |
| A20cl_R                | caudal-lateral of area BA 20     | 61               | -40 | -17 |
| A7ip_R                 | intraparietal area BA 7 (hIP3)   | 31               | -54 | 53  |
| A39c_R                 | caudal area 39 (PGp)             | 45               | -71 | 20  |
| A39rd_R                | rostral dorsal area BA 39 (Hip3) | 39               | -65 | 44  |
| A40c_R                 | caudal area BA 40 (PFm)          | 57               | -44 | 38  |
| A39rv_R                | rostroventral area BA 39 (PGa)   | 53               | -54 | 25  |

\*BA = Brodmann area. Using this template to analysis patients with left prefrontal gliomas and healthy participants.

**Table S5. Montreal Neurological Institute (MNI) locations of 20 nodes in the left executive control network.**

| Regions of interesting | Modified Cyto-architectonic      | Left hemisphere |     |     |
|------------------------|----------------------------------|-----------------|-----|-----|
|                        |                                  | X               | Y   | Z   |
| A8dl_L                 | dorsolateral area BA 8           | -18             | 24  | 53  |
| A9m_L                  | medial area BA 9                 | -5              | 36  | 38  |
| A9/46d_L               | dorsal area BA 9/46              | -27             | 43  | 31  |
| IFJ_L                  | inferior frontal junction        | -42             | 13  | 36  |
| A46_L                  | area BA 46                       | -28             | 56  | 12  |
| A9/46v_L               | ventral area BA 9/46             | -41             | 41  | 16  |
| A8vl_L                 | ventrolateral area BA 8          | -33             | 23  | 45  |
| A6vl_L                 | ventrolateral area BA 6          | -32             | 4   | 55  |
| A10l_L                 | ventrolateral area BA 10         | -26             | 60  | -6  |
| IFS_L                  | inferior frontal sulcus          | -47             | 32  | 14  |
| A45r_L                 | rostral area BA 45               | 49              | 36  | -3  |
| A12/47l_L              | lateral area BA 12/47            | -41             | 32  | -9  |
| A21c_L                 | caudal area BA 21                | -65             | -30 | -12 |
| A37vl_L                | ventrolateral area BA 37         | -55             | -60 | -6  |
| A20cl_L                | caudal-lateral of area BA 20     | -59             | -42 | -16 |
| A7ip_L                 | intraparietal area BA 7 (hIP3)   | -27             | -59 | 54  |
| A39c_L                 | caudal area 39 (PGp)             | -34             | -80 | 29  |
| A39rd_L                | rostral dorsal area BA 39 (Hip3) | -38             | -61 | 46  |
| A40c_L                 | caudal area BA 40 (PFm)          | -56             | -49 | 38  |
| A39rv_L                | rostroventral area BA 39 (PGa)   | -47             | -65 | 26  |

\*BA = Brodmann area. Using this template to analysis patients with right prefrontal gliomas and healthy participants.

**Table S6. Functional connections with significant group effects among the GRE, non-GRE, and health groups (gliomas in left hemisphere)**

| Connections              | Functional connectivity (mean $\pm$ SEM) |                   |                   | <i>p</i> value<br>(ANOVA test) | Bonferroni correction |                |                    |
|--------------------------|------------------------------------------|-------------------|-------------------|--------------------------------|-----------------------|----------------|--------------------|
|                          | GRE group                                | non-GRE group     | Health group      |                                | GRE vs non-GRE        | GRE vs healthy | non-GRE vs healthy |
| Am6_L and Acvl_L         | 0.025 $\pm$ 0.057                        | 0.357 $\pm$ 0.055 | 0.399 $\pm$ 0.037 | < 0.0001                       | < 0.0001              | < 0.0001       | > 0.9999           |
| Acvl_L and A4tl_R        | 0.131 $\pm$ 0.047                        | 0.356 $\pm$ 0.042 | 0.436 $\pm$ 0.040 | 0.0097                         | 0.0583                | 0.0091         | > 0.9999           |
| Acvl_L and A1/2/3tonla_R | 0.063 $\pm$ 0.061                        | 0.279 $\pm$ 0.053 | 0.854 $\pm$ 0.058 | 0.0085                         | 0.0850                | 0.0069         | > 0.9999           |
| Am6_R and Acvl_L         | 0.074 $\pm$ 0.064                        | 0.281 $\pm$ 0.057 | 0.428 $\pm$ 0.043 | 0.0005                         | 0.0682                | 0.0003         | 0.9596             |
| Am6_L and Acvl_R         | 0.108 $\pm$ 0.050                        | 0.336 $\pm$ 0.057 | 0.418 $\pm$ 0.047 | 0.0036                         | 0.0503                | 0.0027         | 0.2716             |
| A4ul_L and A4ul_R        | 0.431 $\pm$ 0.077                        | 0.667 $\pm$ 0.074 | 0.812 $\pm$ 0.057 | 0.0014                         | 0.0783                | 0.0009         | 0.3488             |

\* BA = Brodmann area. Am6\_L = medial BA 6 in the left hemisphere; Am6\_R = medial BA 6 in the right hemisphere; Acvl\_L = caudal ventrolateral BA 6 in the left hemisphere; Acvl\_R = caudal ventrolateral BA 6 in the right hemisphere; A4tl\_R = tongue and larynx region in the right hemisphere; A1/2/3tonla\_R = tongue and larynx region of BA 1/2/3 in the right hemisphere; A4ul\_L = upper limb region of BA 4 in the left hemisphere; A4ul\_R = upper limb region of BA 4 in the right hemisphere. Threshold of Bonferroni correction was  $p$  value =  $2.16 \times 10^{-4}$ .

**Table S7. Functional connections with significant group effects among the GRE, non-GRE, and health groups (gliomas in right hemisphere)**

| Connections             | Functional connectivity (mean $\pm$ SEM) |                   |                   | <i>p</i> value<br>(ANOVA test) | Bonferroni correction |                |                    |
|-------------------------|------------------------------------------|-------------------|-------------------|--------------------------------|-----------------------|----------------|--------------------|
|                         | GRE group                                | non-GER group     | Health group      |                                | GRE vs non-GRE        | GRE vs healthy | non-GRE vs healthy |
| Am6_R and Acvl_R        | 0.118 $\pm$ 0.048                        | 0.437 $\pm$ 0.033 | 0.429 $\pm$ 0.048 | 0.0005                         | 0.0002                | < 0.0001       | > 0.9999           |
| Am6_R and A4hf_L        | 0.252 $\pm$ 0.042                        | 0.626 $\pm$ 0.083 | 0.575 $\pm$ 0.050 | 0.0004                         | 0.0007                | 0.0014         | > 0.9999           |
| A4ul_L and A1/2/3ulhf_R | 0.359 $\pm$ 0.089                        | 0.601 $\pm$ 0.080 | 0.691 $\pm$ 0.051 | 0.0055                         | 0.0861                | 0.0042         | > 0.9999           |

\* BA = Brodmann area. Am6\_R = medial BA 6 in the right hemisphere; Acvl\_R = caudal ventrolateral BA 6 in the right hemisphere; A4ul\_L = upper limb region of BA 4 in the left hemisphere; A4hf\_L = head and face region of BA 4 in the left hemisphere; A1/2/3ulhf\_R = upper limb, head and face region of BA 1/2/3 in the right hemisphere. Threshold of Bonferroni correction was  $p$  value =  $2.16 \times 10^{-4}$ .

**Table S8. Topological properties compared between the patient and healthy groups (gliomas in the left hemisphere)**

|                        | GRE group     | non-GRE group | Health group  | One-way ANOVA (p value) | GRE vs non-GRE (p value) | GRE vs Health (p value) | non-GRE vs n Health (p value) |
|------------------------|---------------|---------------|---------------|-------------------------|--------------------------|-------------------------|-------------------------------|
| Global efficiency      | 0.430 ± 0.012 | 0.391 ± 0.009 | 0.416 ± 0.006 | 0.0118                  | 0.0133                   | 0.9000                  | 0.0882                        |
| Local efficiency       | 0.573 ± 0.014 | 0.557 ± 0.012 | 0.554 ± 0.010 | 0.5375                  | -                        | -                       | -                             |
| Shortest path length   | 2.473 ± 0.079 | 2.747 ± 0.081 | 2.589 ± 0.047 | 0.0306                  | 0.0292                   | 0.7191                  | 0.2553                        |
| Clustering coefficient | 0.485 ± 0.014 | 0.479 ± 0.012 | 0.475 ± 0.009 | 0.8242                  | -                        | -                       | -                             |
| Gamma                  | 1.691 ± 0.093 | 1.636 ± 0.113 | 1.684 ± 0.088 | 0.9144                  | -                        | -                       | -                             |
| Lambda                 | 1.097 ± 0.021 | 1.140 ± 0.026 | 1.143 ± 0.016 | 0.3004                  | -                        | -                       | -                             |
| Sigma                  | 1.533 ± 0.078 | 1.426 ± 0.078 | 1.474 ± 0.075 | 0.6734                  | -                        | -                       | -                             |

\* The global properties were calculated with one-way ANOVA test. If the results one-way ANOVA were significance, post-hoc analysis with least significant difference was subsequently applied.



**Table S9. Topological properties compared between the patient and healthy groups (gliomas in the right hemisphere)**

|                        | GRE group     | non-GRE group | Health group  | One-way ANOVA (p value) | GRE vs non-GRE (p value) | GRE vs Health (p value) | non-GRE vs n Health (p value) |
|------------------------|---------------|---------------|---------------|-------------------------|--------------------------|-------------------------|-------------------------------|
| Global efficiency      | 0.522 ± 0.003 | 0.494 ± 0.007 | 0.416 ± 0.006 | < 0.0001                | 0.0214                   | < 0.0001                | < 0.0001                      |
| Local efficiency       | 0.662 ± 0.016 | 0.624 ± 0.012 | 0.554 ± 0.010 | < 0.0001                | 0.2310                   | < 0.0001                | 0.0011                        |
| Shortest path length   | 1.959 ± 0.029 | 2.170 ± 0.044 | 2.589 ± 0.047 | < 0.0001                | 0.0129                   | < 0.0001                | < 0.0001                      |
| Clustering coefficient | 0.548 ± 0.014 | 0.525 ± 0.009 | 0.475 ± 0.009 | < 0.0001                | 0.6549                   | < 0.0001                | 0.0069                        |
| Gamma                  | 1.464 ± 0.071 | 1.289 ± 0.067 | 1.684 ± 0.088 | 0.0118                  | 0.7862                   | 0.2927                  | 0.0122                        |
| Lambda                 | 1.029 ± 0.005 | 1.054 ± 0.014 | 1.143 ± 0.016 | < 0.0001                | > 0.9999                 | < 0.0001                | 0.0010                        |
| Sigma                  | 1.415 ± 0.064 | 1.227 ± 0.067 | 1.478 ± 0.075 | 0.5387                  | -                        | -                       | -                             |

\* The global properties were calculated with one-way ANOVA test. If the results one-way ANOVA were significance, post-hoc analysis with least significant difference was subsequently applied.

**Table S10. Nodal efficiency compared between the patients and healthy groups**

| Node name   | Glioma grew in the left prefrontal lobe |               |               |                         | Glioma grew in the right prefrontal lobe |               |               |                         |
|-------------|-----------------------------------------|---------------|---------------|-------------------------|------------------------------------------|---------------|---------------|-------------------------|
|             | GRE group                               | non-GRE group | Health group  | One-way ANOVA (p value) | GRE group                                | non-GRE group | Health group  | One-way ANOVA (p value) |
| A6m         | 0.320 ± 0.066                           | 0.376 ± 0.041 | 0.368 ± 0.034 | 0.684                   | 0.522 ± 0.014                            | 0.492 ± 0.013 | 0.368 ± 0.034 | 0.104                   |
| A4hf        | 0.498 ± 0.032                           | 0.441 ± 0.027 | 0.440 ± 0.038 | 0.468                   | 0.458 ± 0.054                            | 0.429 ± 0.059 | 0.440 ± 0.038 | 0.924                   |
| A4ul        | 0.450 ± 0.026                           | 0.451 ± 0.032 | 0.484 ± 0.021 | 0.569                   | 0.662 ± 0.016                            | 0.624 ± 0.012 | 0.484 ± 0.021 | 0.661                   |
| A4t         | 0.480 ± 0.029                           | 0.473 ± 0.029 | 0.470 ± 0.025 | 0.973                   | 0.548 ± 0.014                            | 0.525 ± 0.008 | 0.470 ± 0.025 | 0.349                   |
| A4tl        | 0.354 ± 0.050                           | 0.295 ± 0.043 | 0.317 ± 0.035 | 0.663                   | 0.463 ± 0.067                            | 0.288 ± 0.064 | 0.317 ± 0.035 | 0.446                   |
| A1_2_3ll    | 0.474 ± 0.029                           | 0.364 ± 0.036 | 0.353 ± 0.030 | 0.067                   | 0.229 ± 0.004                            | 0.354 ± 0.012 | 0.353 ± 0.030 | 0.507                   |
| A4ll        | 0.482 ± 0.018                           | 0.457 ± 0.019 | 0.498 ± 0.024 | 0.401                   | 0.417 ± 0.061                            | 0.496 ± 0.064 | 0.498 ± 0.024 | 0.804                   |
| A1_2_3ulhf  | 0.473 ± 0.040                           | 0.491 ± 0.023 | 0.468 ± 0.025 | 0.840                   | 0.595 ± 0.018                            | 0.550 ± 0.052 | 0.468 ± 0.025 | 0.163                   |
| A1_2_3tonIa | 0.389 ± 0.052                           | 0.409 ± 0.043 | 0.423 ± 0.026 | 0.835                   | 0.546 ± 0.055                            | 0.576 ± 0.036 | 0.423 ± 0.026 | 0.495                   |
| A2          | 0.453 ± 0.047                           | 0.351 ± 0.044 | 0.412 ± 0.035 | 0.286                   | 0.545 ± 0.029                            | 0.577 ± 0.023 | 0.412 ± 0.035 | 0.620                   |
| A1_2_3tru   | 0.272 ± 0.045                           | 0.294 ± 0.042 | 0.304 ± 0.035 | 0.862                   | 0.456 ± 0.066                            | 0.488 ± 0.068 | 0.304 ± 0.035 | 0.172                   |
| A6m         | 0.303 ± 0.036                           | 0.239 ± 0.047 | 0.332 ± 0.030 | 0.214                   | 0.504 ± 0.066                            | 0.519 ± 0.032 | 0.332 ± 0.030 | 0.140                   |
| A4hf        | 0.171 ± 0.050                           | 0.173 ± 0.040 | 0.241 ± 0.040 | 0.410                   | 0.500 ± 0.051                            | 0.430 ± 0.053 | 0.241 ± 0.040 | 0.176                   |
| A4ul        | 0.306 ± 0.047                           | 0.211 ± 0.043 | 0.288 ± 0.037 | 0.265                   | 0.573 ± 0.021                            | 0.603 ± 0.025 | 0.288 ± 0.037 | 0.409                   |
| A4t         | 0.540 ± 0.025                           | 0.545 ± 0.015 | 0.522 ± 0.022 | 0.730                   | 0.477 ± 0.071                            | 0.598 ± 0.022 | 0.522 ± 0.022 | 0.716                   |
| A4tl        | 0.567 ± 0.018                           | 0.530 ± 0.013 | 0.542 ± 0.016 | 0.313                   | 0.542 ± 0.046                            | 0.514 ± 0.039 | 0.542 ± 0.016 | 0.100                   |
| A1_2_3ll    | 0.473 ± 0.021                           | 0.341 ± 0.036 | 0.433 ± 0.029 | 0.194                   | 0.514 ± 0.039                            | 0.456 ± 0.060 | 0.433 ± 0.029 | 0.434                   |
| A4ll        | 0.416 ± 0.034                           | 0.374 ± 0.041 | 0.456 ± 0.020 | 0.168                   | 0.496 ± 0.029                            | 0.347 ± 0.065 | 0.456 ± 0.020 | 0.082                   |
| A1_2_3ulhf  | 0.496 ± 0.021                           | 0.459 ± 0.026 | 0.376 ± 0.031 | 0.156                   | 0.477 ± 0.054                            | 0.243 ± 0.059 | 0.376 ± 0.031 | 0.166                   |

\* The global properties were calculated with one-way ANOVA test. If the results one-way ANOVA were significance, post-hoc analysis with least significant difference was subsequently applied.

**Table S11. Nodal local efficiency compared between the patients and healthy groups**

| Node name   | Glioma grew in the left prefrontal lobe |               |               |                         | Glioma grew in the right prefrontal lobe |               |               |                         |
|-------------|-----------------------------------------|---------------|---------------|-------------------------|------------------------------------------|---------------|---------------|-------------------------|
|             | GRE group                               | non-GRE group | Health group  | One-way ANOVA (p value) | GRE group                                | non-GRE group | Health group  | One-way ANOVA (p value) |
| A6m         | 0.434 ± 0.090                           | 0.589 ± 0.064 | 0.476 ± 0.067 | 0.328                   | 0.746 ± 0.040                            | 0.658 ± 0.076 | 0.476 ± 0.067 | 0.281                   |
| A4hf        | 0.624 ± 0.054                           | 0.582 ± 0.066 | 0.570 ± 0.062 | 0.835                   | 0.634 ± 0.071                            | 0.609 ± 0.080 | 0.570 ± 0.062 | 0.947                   |
| A4ul        | 0.744 ± 0.061                           | 0.717 ± 0.064 | 0.705 ± 0.055 | 0.882                   | 0.680 ± 0.080                            | 0.748 ± 0.045 | 0.705 ± 0.055 | 0.761                   |
| A4t         | 0.697 ± 0.058                           | 0.740 ± 0.050 | 0.711 ± 0.045 | 0.828                   | 0.601 ± 0.098                            | 0.639 ± 0.104 | 0.711 ± 0.045 | 0.360                   |
| A4tl        | 0.361 ± 0.080                           | 0.400 ± 0.076 | 0.452 ± 0.069 | 0.704                   | 0.507 ± 0.086                            | 0.638 ± 0.071 | 0.452 ± 0.069 | 0.588                   |
| A1_2_3ll    | 0.529 ± 0.066                           | 0.516 ± 0.078 | 0.430 ± 0.071 | 0.592                   | 0.660 ± 0.083                            | 0.568 ± 0.099 | 0.430 ± 0.071 | 0.479                   |
| A4ll        | 0.778 ± 0.037                           | 0.707 ± 0.045 | 0.565 ± 0.059 | 0.082                   | 0.832 ± 0.047                            | 0.767 ± 0.028 | 0.565 ± 0.059 | 0.136                   |
| A1_2_3ulhf  | 0.700 ± 0.064                           | 0.697 ± 0.054 | 0.559 ± 0.056 | 0.132                   | 0.667 ± 0.099                            | 0.801 ± 0.022 | 0.559 ± 0.056 | 0.465                   |
| A1_2_3tonIa | 0.480 ± 0.100                           | 0.591 ± 0.078 | 0.576 ± 0.066 | 0.643                   | 0.690 ± 0.072                            | 0.665 ± 0.088 | 0.576 ± 0.066 | 0.616                   |
| A2          | 0.588 ± 0.086                           | 0.559 ± 0.076 | 0.564 ± 0.066 | 0.963                   | 0.693 ± 0.097                            | 0.615 ± 0.099 | 0.564 ± 0.066 | 0.775                   |
| A1_2_3tru   | 0.366 ± 0.100                           | 0.440 ± 0.080 | 0.397 ± 0.068 | 0.816                   | 0.725 ± 0.067                            | 0.402 ± 0.114 | 0.397 ± 0.068 | 0.083                   |
| A6m         | 0.376 ± 0.080                           | 0.320 ± 0.083 | 0.433 ± 0.070 | 0.567                   | 0.662 ± 0.084                            | 0.324 ± 0.112 | 0.433 ± 0.070 | 0.111                   |
| A4hf        | 0.233 ± 0.094                           | 0.154 ± 0.059 | 0.325 ± 0.068 | 0.232                   | 0.552 ± 0.117                            | 0.444 ± 0.110 | 0.325 ± 0.068 | 0.274                   |
| A4ul        | 0.353 ± 0.088                           | 0.192 ± 0.067 | 0.387 ± 0.076 | 0.178                   | 0.346 ± 0.111                            | 0.315 ± 0.111 | 0.387 ± 0.076 | 0.933                   |
| A4t         | 0.662 ± 0.039                           | 0.780 ± 0.027 | 0.671 ± 0.041 | 0.064                   | 0.694 ± 0.047                            | 0.797 ± 0.032 | 0.671 ± 0.041 | 0.305                   |
| A4tl        | 0.677 ± 0.039                           | 0.779 ± 0.027 | 0.674 ± 0.042 | 0.111                   | 0.691 ± 0.080                            | 0.758 ± 0.018 | 0.674 ± 0.042 | 0.382                   |
| A1_2_3ll    | 0.616 ± 0.079                           | 0.531 ± 0.091 | 0.535 ± 0.064 | 0.729                   | 0.741 ± 0.065                            | 0.602 ± 0.064 | 0.535 ± 0.064 | 0.409                   |
| A4ll        | 0.611 ± 0.085                           | 0.499 ± 0.081 | 0.606 ± 0.061 | 0.523                   | 0.491 ± 0.101                            | 0.570 ± 0.122 | 0.606 ± 0.061 | 0.338                   |
| A1_2_3ulhf  | 0.667 ± 0.035                           | 0.639 ± 0.056 | 0.498 ± 0.071 | 0.123                   | 0.650 ± 0.059                            | 0.717 ± 0.053 | 0.498 ± 0.071 | 0.809                   |

\* The global properties were calculated with one-way ANOVA test. If the results one-way ANOVA were significance, post-hoc analysis with least significant difference was subsequently applied.
